# Supplementary material for: Using Small RNA Deep Sequencing Data to Detect Human Viruses
Source: Hindawi journal article supplement (doi:10.1155/2016/2596782), 2016-01-01

Supp. 1 Virus detection reports for six data

Figure S1. HPV-18 contigs from SRR031636

| Reference              | Length | Read_cov(%) | #(Contig_cov%) | Depth    |
|------------------------|--------|-------------|----------------|----------|
| <a href="#">M20325</a> | 3135   | 2324(74.1)  | 19(62.5)       | 0.6(8.5) |

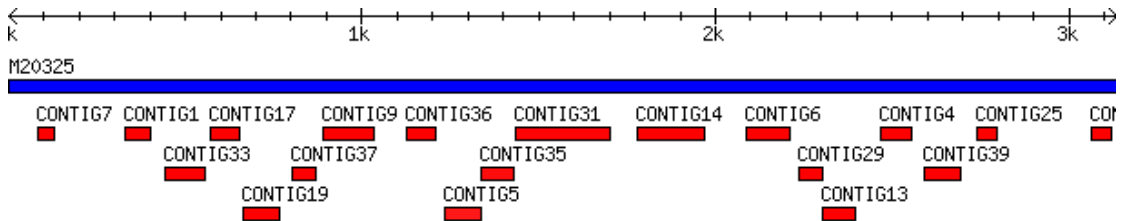

Figure S2. HBV contigs from SRR039620

| Reference                | Length | Read_cov(%) | #(Contig_cov%) | Depth    |
|--------------------------|--------|-------------|----------------|----------|
| <a href="#">JQ688404</a> | 3215   | 1756(54.6)  | 7(13.3)        | 0.2(6.0) |

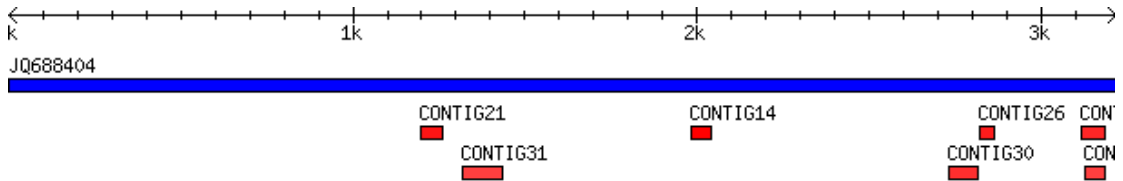

Figure S3. HCV contigs from SRR039622

| Reference              | Length | Read_cov(%) | #(Contig_cov%) | Depth    |
|------------------------|--------|-------------|----------------|----------|
| <a href="#">D85516</a> | 9535   | 1032(10.8)  | 1(0.5)         | 0.0(1.8) |

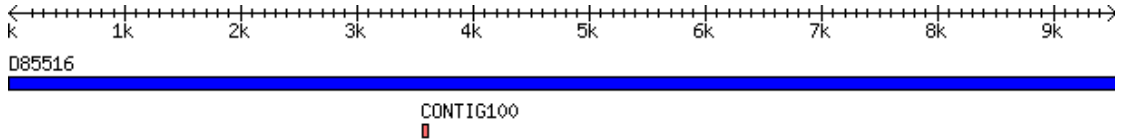

**Figure S4. HIV-1 contigs from SRR941591**

| Reference              | Length | Read_cov(%) | #(Contig_cov%) | Depth      |
|------------------------|--------|-------------|----------------|------------|
| <a href="#">M19921</a> | 14825  | 5831(39.3)  | 53(32.6)       | 3.5(210.1) |

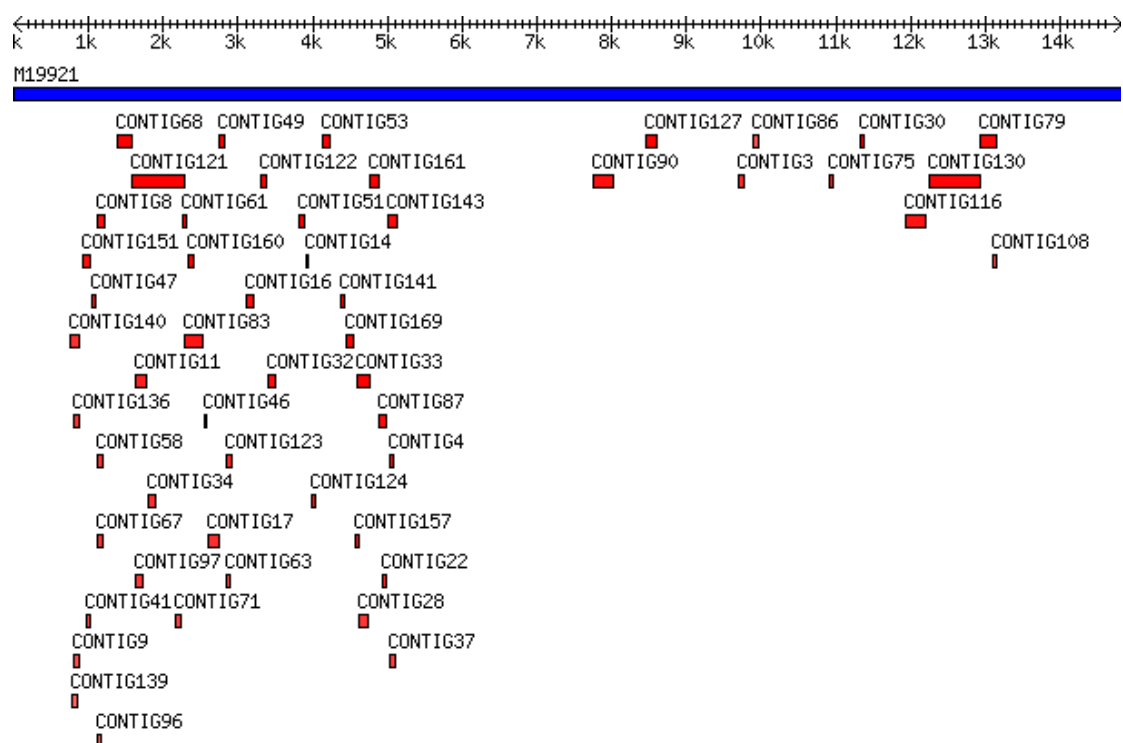

**Figure S5. SMRV contigs from SRR1563017**

| Reference              | Length | Read_cov(%) | #(Contig_cov%) | Depth        |
|------------------------|--------|-------------|----------------|--------------|
| <a href="#">M23385</a> | 8785   | 8732(99.4)  | 1(76.9)        | 318.0(494.5) |

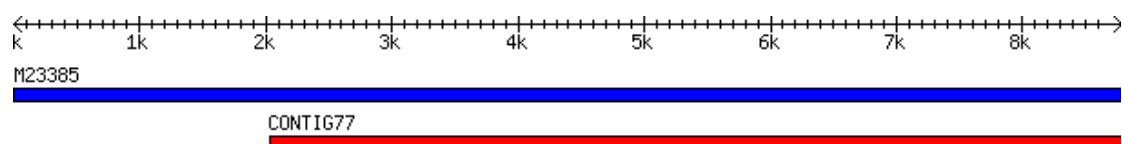

**Figure S6. EBV contigs from SRR1563063**

| Reference              | Length | Read_cov(%) | #(Contig_cov%) | Depth     |
|------------------------|--------|-------------|----------------|-----------|
| <a href="#">M80517</a> | 184113 | 37898(20.6) | 34(1.4)        | 1.2(52.8) |

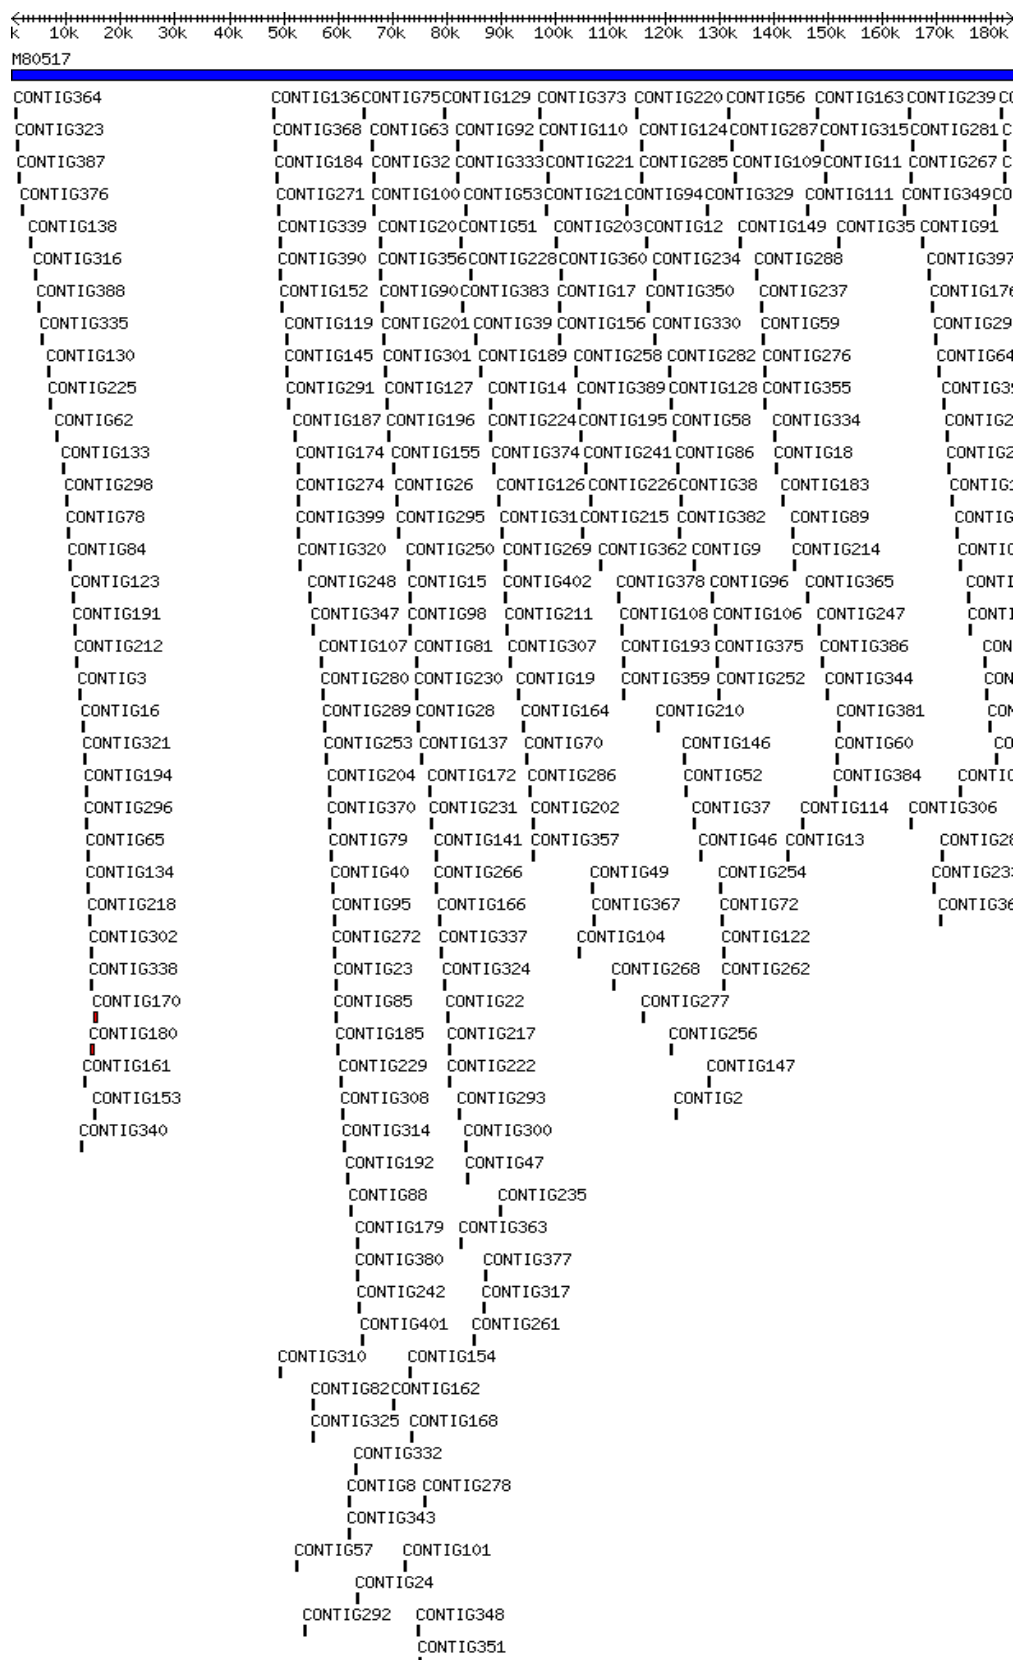

## Supp. 2 Read distribution on six virus genomes

Figure S7. HPV-18 reads distribution in SRR031636

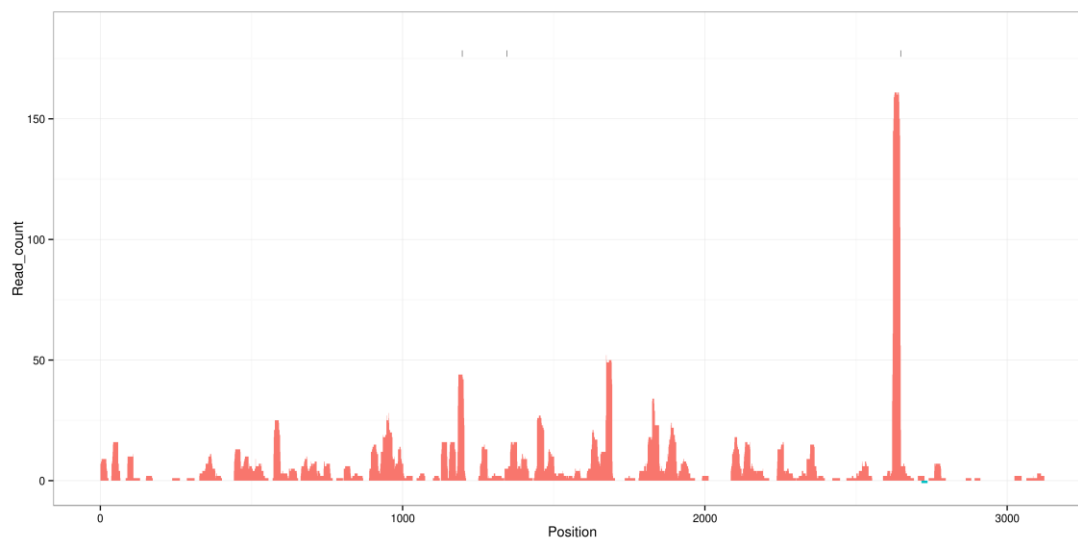

Figure S8. HBV reads distribution in SRR039620

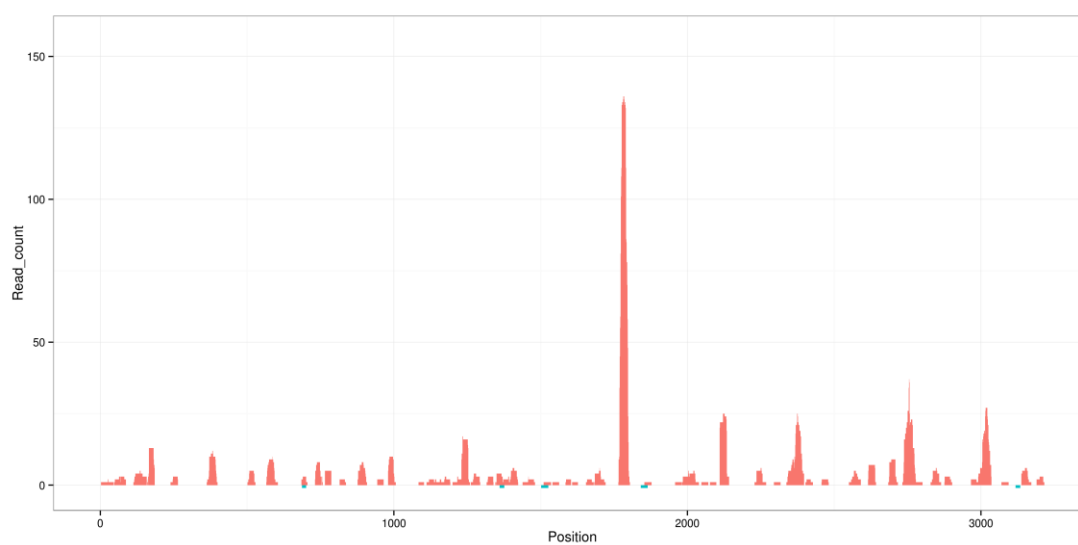

Figure S9. HCV reads distribution in SRR039622

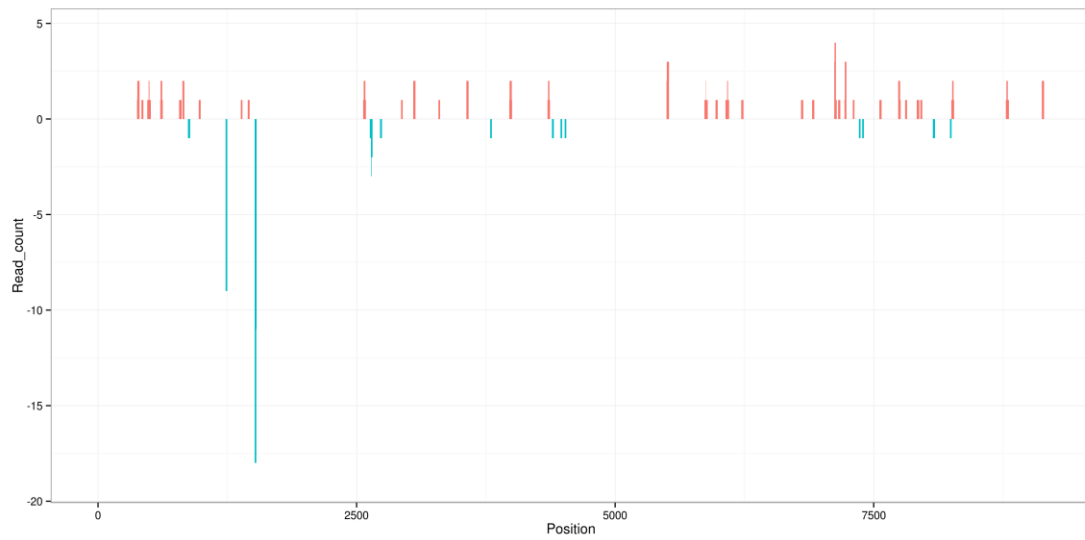

Figure S10. HIV-1 reads distribution in SRR941591

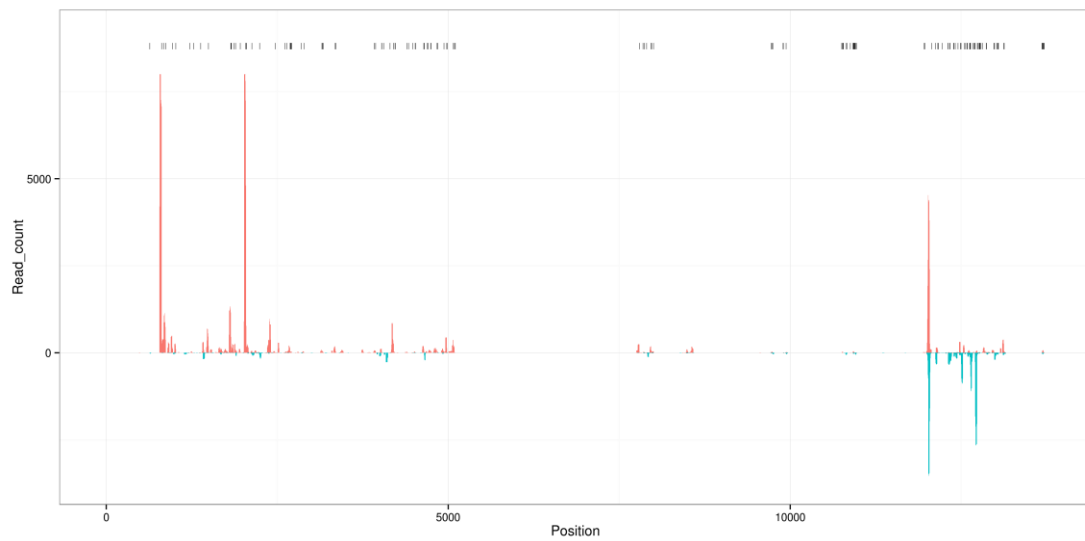

Figure S11. SMRV reads distribution in SRR1563017

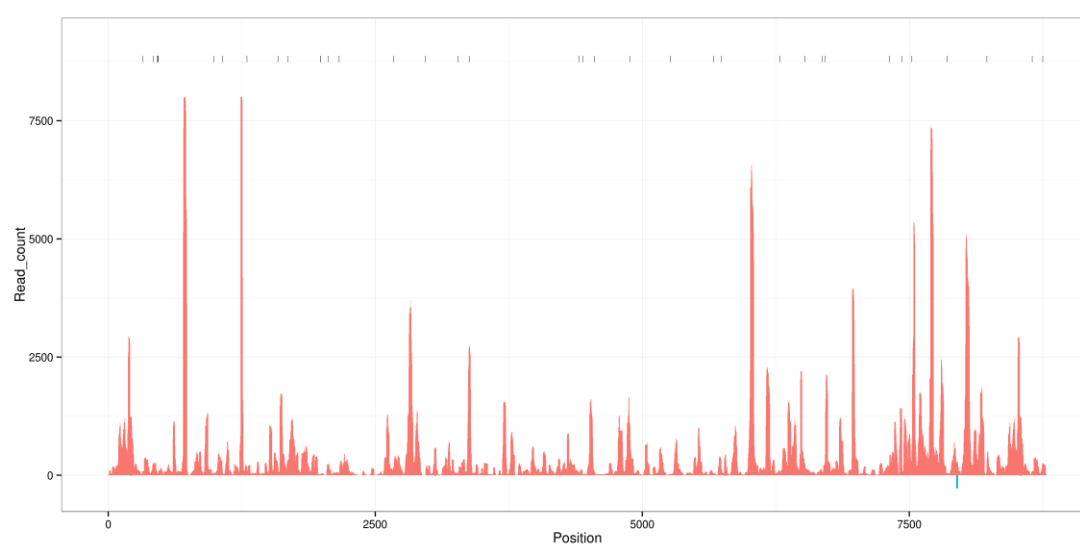

Figure S12. EBV reads distribution in SRR1563063

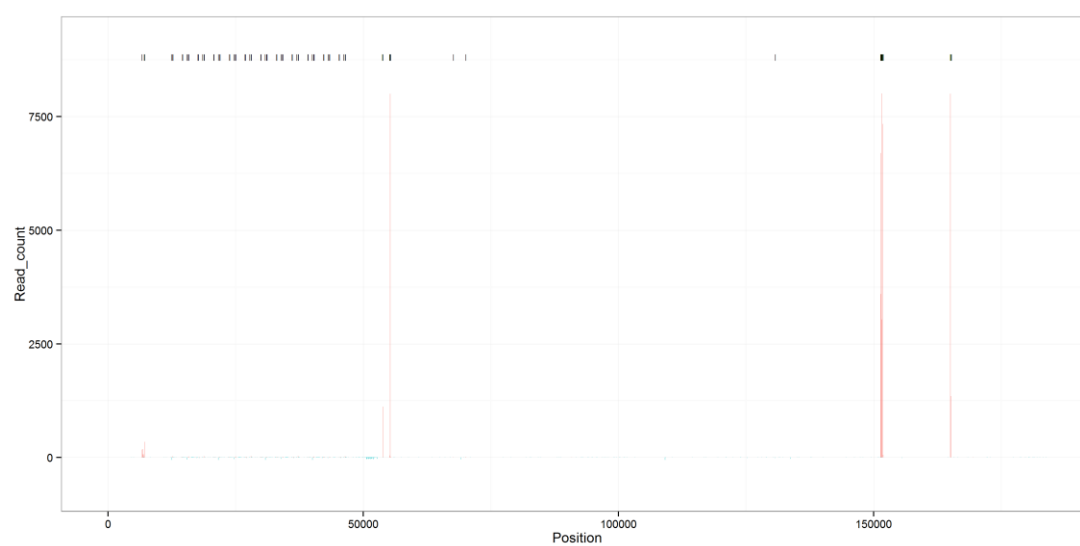

## Supp. 3 Four miRNAs from seven duplexes

### 1. The first mature miRNA:

```
=====miRNA=====
CCCCGGGCCTGAAGAGGTTGAC
TTGGGGCCCGGACTTCTCCAAC

Query: 1-22 rlcY-miR-rL1-1-3p: 1-22 score: 101 evaluate: 0.004
UserSeq          1 ccccgggcccggaagagguugac 22
                  | |||||
rlcY-miR-rL1-1-3p 1 cuccggggcccggaagagguugac 22
```

### 2. The second mature miRNA:

```
=====miRNA=====
TCTTAGTGGAAGTGACGTGCTG
CCAGAATCACCTTCACTGCACG

Query: 1-20 eby-miR-BART1-5p: 1-20 score: 100 evaluate: 0.004
UserSeq          1 ucuuaguggaagugacgugc 20
                  |||||
eby-miR-BART1-5p 1 ucuuaguggaagugacgugc 20
```

### 3. The third mature miRNA:

```
=====miRNA=====
TAGCCCCGCTATCCACTATGTC
GTATCGGGGCGATAGGTGATAC

Query: 1-22 eby-miR-BART1-3p: 1-22 score: 101 evaluate: 0.003
UserSeq          1 uagcccgccuauccacuauguc 22
                  |||| |||||
eby-miR-BART1-3p 1 uagcaccgcuauccacuauguc 22
```

### 4. The predicted miRNA:

```
=====miRNA=====
GCCGGGCGGCCGCGGTGGGTC
CGGCCC GCCGGCGCCACCCAG
```

**Predicted miRNA precursor sequence, 90 bp, dG = -69.8 [Initially -69.3]**

gccgggCGGCCGCGGTGGGTCGCTGGGCGGCTGCCCCGCTCCGGGTGGGGGGTGG  
CCCCGCTGGGACCGCTGCGCCGCCGCCAGGT

15May03-09-11-36-1db38914b3 is the 2584933rd nucleic acid sequence folded on the RNA Institute mfold server.

- Sunday, May 03 09:11:38 EDT 2015 -

The repeated regions on the M80517 reference sequence.

```
>M80517:50578-50702
50578                               50623                               50702
CCGCCAGGTCCTGGGGCAGCCGGGGTTCCTGGCGCTCCGGGGGCAgcccgggcggccgcccgtgggtcCGCTGGGCCGCTGCCCCGCTCCGGGTGGGGGGTGGCCCCGCTGGGCACCGCTGCGCCG
>M80517:50703-50827
CCGCCAGGTCCTGGGGCAGCCGGGGTTCCTGGCGCTCCGGGGGCAgcccgggcggccgcccgtgggtcCGCTGGGCCGCTGCCCCGCTCCGGGTGGGGGGTGGCCCCGCTGGGCACCGCTGCGCCG
>M80517:50828-50952
CCGCCAGGTCCTGGGGCAGCCGGGGTTCCTGGCGCTCCGGGGGCAgcccgggcggccgcccgtgggtcCGCTGGGCCGCTGCCCCGCTCCGGGTGGGGGGTGGCCCCGCTGGGCACCGCTGCGCCG
>M80517:50953-51077
CCGCCAGGTCCTGGGGCAGCCGGGGTTCCTGGCGCTCCGGGGGCAgcccgggcggccgcccgtgggtcCGCTGGGCCGCTGCCCCGCTCCGGGTGGGGGGTGGCCCCGCTGGGCACCGCTGCGCCG
>M80517:51078-51202
CCGCCAGGTCCTGGGGCAGCCGGGGTTCCTGGCGCTCCGGGGGCAgcccgggcggccgcccgtgggtcCGCTGGGCCGCTGCCCCGCTCCGGGTGGGGGGTGGCCCCGCTGGGCACCGCTGCGCCG
>M80517:51203-51327
CCGCCAGGTCCTGGGGCAGCCGGGGTTCCTGGCGCTCCGGGGGCAgcccgggcggccgcccgtgggtcCGCTGGGCCGCTGCCCCGCTCCGGGTGGGGGGTGGCCCCGCTGGGCACCGCTGCGCCG
>M80517:51328-51452
CCGCCAGGTCCTGGGGCAGCCGGGGTTCCTGGCGCTCCGGGGGCAgcccgggcggccgcccgtgggtcCGCTGGGCCGCTGCCCCGCTCCGGGTGGGGGGTGGCCCCGCTGGGCACCGCTGCGCCG
>M80517:51453-51577
CCGCCAGGTCCTGGGGCAGCCGGGGTTCCTGGCGCTCCGGGGGCAgcccgggcggccgcccgtgggtcCGCTGGGCCGCTGCCCCGCTCCGGGTGGGGGGTGGCCCCGCTGGGCACCGCTGCGCCG
>M80517:51578-51702
CCGCCAGGTCCTGGGGCAGCCGGGGTTCCTGGCGCTCCGGGGGCAgcccgggcggccgcccgtgggtcCGCTGGGCCGCTGCCCCGCTCCGGGTGGGGGGTGGCCCCGCTGGGCACCGCTGCGCCG
>M80517:51703-51827
CCGCCAGGTCCTGGGGCAGCCGGGGTTCCTGGCGCTCCGGGGGCAgcccgggcggccgcccgtgggtcCGCTGGGCCGCTGCCCCGCTCCGGGTGGGGGGTGGCCCCGCTGGGCACCGCTGCGCCG
>M80517:51828-51952
CCGCCAGGTCCTGGGGCAGCCGGGGTTCCTGGCGCTCCGGGGGCAgcccgggcggccgcccgtgggtcCGCTGGGCCGCTGCCCCGCTCCGGGTGGGGGGTGGCCCCGCTGGGCACCGCTGCGCCG
>M80517:51953-52077
CCGCCAGGTCCTGGGGCAGCCGGGGTTCCTGGCGCTCCGGGGGCAgcccgggcggccgcccgtgggtcCGCTGGGCCGCTGCCCCGCTCCGGGTGGGGGGTGGCCCCGCTGGGCACCGCTGCGCCG
>M80517:52078-52115
CCGCCAGGTCCTGGGGCAGCCGGGGTTCCTGGCGCTCC
```



## Supp. 4 The predicted second structures of seven duplexes

### 1. The first mature miRNA:

| pre-miRNA                                                                                 | Length | C+G | MFE(-) | MFEI |
|-------------------------------------------------------------------------------------------|--------|-----|--------|------|
| rlcv-mir-rL1-1                                                                            | 85     | 49  | 37.70  | 0.91 |
| GGCCGGCUCCUUAUUAACCUGAUCAGCCCCGGGGUUGCCUGUCU<br>UAGCACUAAcuccgggccugaagagguugacAAGAAGGGUC |        |     |        |      |

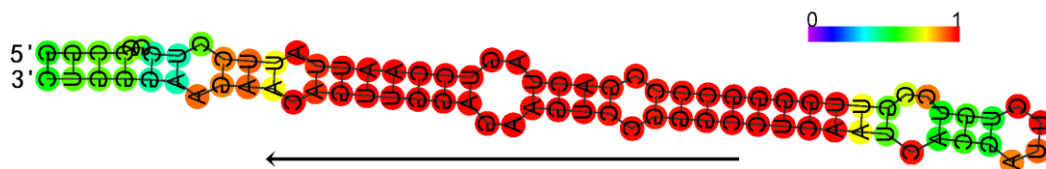

Note: the mature miRNA is in lower case letters

### 2. The second and third mature miRNA:

| pre-miRNA                                                                   | Length | C+G | MFE(-) | MFEI |
|-----------------------------------------------------------------------------|--------|-----|--------|------|
| ebv-mir-BART1                                                               | 70     | 39  | 30.57  | 1.12 |
| GGGGGucuuaguggaagugacgugcugUGAAUAC<br>AGGUCCAuagcaccgcuauccacuaugucUCGCCCCG |        |     |        |      |

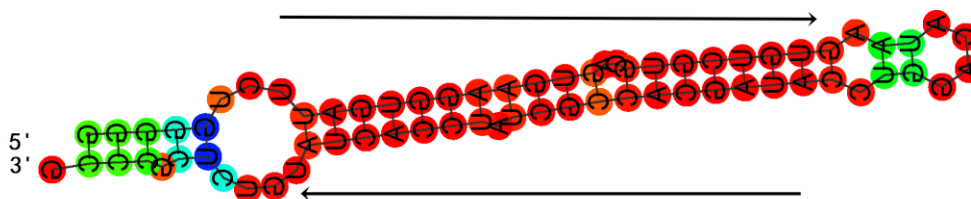

### 3. The predicted mature miRNA:

| pre-miRNA                                                                                    | Length | C+G | MFE(-) | MFEI |
|----------------------------------------------------------------------------------------------|--------|-----|--------|------|
| new finding                                                                                  | 90     | 77  | 69.46  | 1.00 |
| gccggggcgccgcgggtgggtcCGCTGGGCGCTGCCCCGCTCC<br>GGGTGGGGGGTGGCCCCGCTGGGCACCGCTGCGCCGCCGCCAGGT |        |     |        |      |

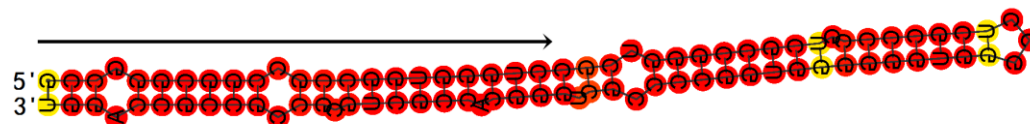

### 4. The unknown 1 and 2 duplexes:

| Two duplexes | unknown | Length | C+G | MFE(-) | MFEI |
|--------------|---------|--------|-----|--------|------|
| NA           |         | 76     | 65  | 46.46  | 0.94 |

|                                                                                  |
|----------------------------------------------------------------------------------|
| CCCCCcagaccggtctcggccagCCGAGCCGACCGGCCC<br>CGCGCCTGGcgcctcctcggggccagccgcgCCGGGG |
|----------------------------------------------------------------------------------|

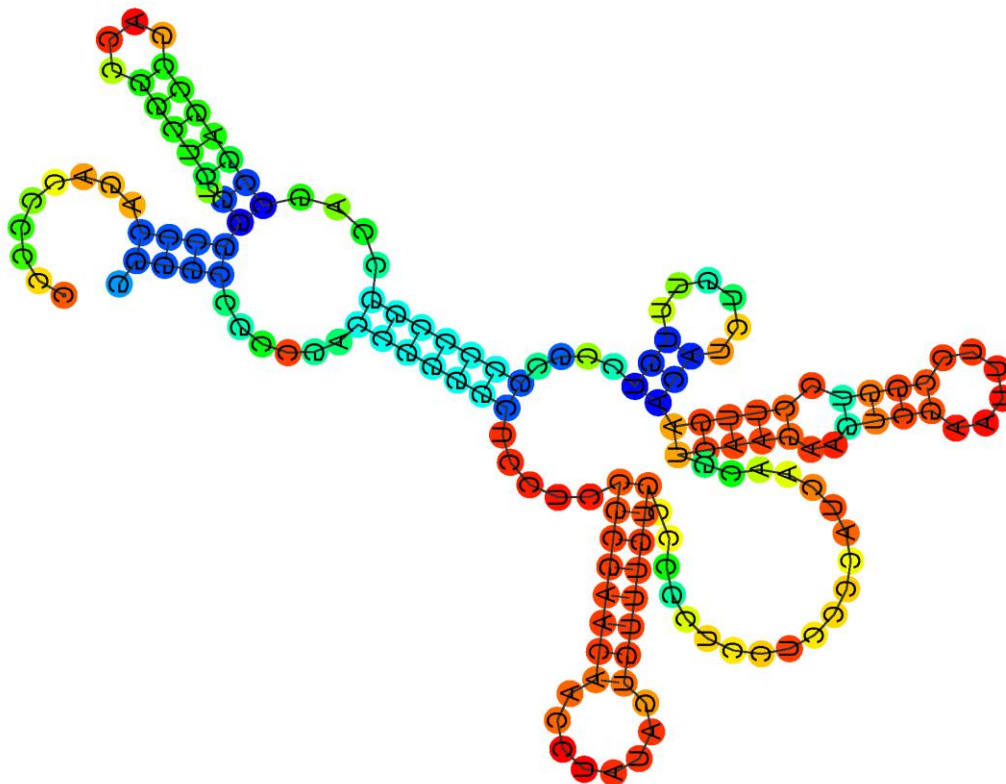

##### 5. The unknown 3 duplex:

| unknown duplex                                                                      | Length | C+G | MFE(-) | MFEI |
|-------------------------------------------------------------------------------------|--------|-----|--------|------|
| NA                                                                                  | 80     | 39  | 10.4   | 0.33 |
| ttgtctacaagtctctggccTTTAAGCTGAAGAACTGCAACTACCCCTCCTCGCCC<br>GTGTTTGTGATATCCAACAACGG |        |     |        |      |

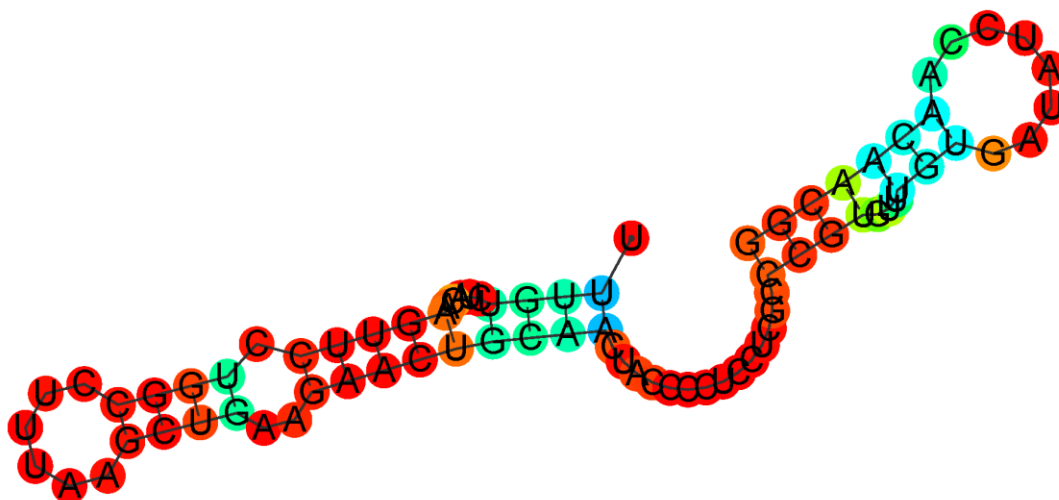

Supplement: f1 [file 2596782.f1.pdf]
